# Supplementary material for: Increased plasma levels of galectin-1 in pancreatic cancer: potential use as biomarker
Source: PubMed Central journal article supplement (PMC6152472; doi:10.18632/oncotarget.26034), 2018-08-31
Supplement: oncotarget-09-32984-s001.pdf [file oncotarget-09-32984-s001.pdf]

## Increased plasma levels of galectin-1 in pancreatic cancer: potential use as biomarker

### SUPPLEMENTARY MATERIALS

**Supplementary Table 1: Summary of the clinicopathological data of patients included in the analysis of the quantification of Gal-1 expression by IHC in tissue**

|           |              | <i>n</i> | Median | IQR   | <i>p</i>  |
|-----------|--------------|----------|--------|-------|-----------|
| Age       | ≤70          | 30       | 41.80  | 42.92 |           |
|           | >70          | 48       | 32.23  | 41.73 | ns        |
| Sex       | Male         | 45       | 33.70  | 50.04 |           |
|           | Female       | 33       | 37.75  | 40.38 | ns        |
| Pathology | Healthy      | 19       | 4.60   | 6.06  |           |
|           | Pancreatitis | 13       | 59.33  | 27.07 | <0.001    |
|           | PanIN        | 9        | 29.77  | 14.82 | <0.001    |
|           | IPMN         | 7        | 25.76  | 16.14 | <0.001    |
|           | PDA          | 30       | 54.29  | 26.61 | <0.001    |
| TNM       | 0            | 1        | 63.46  | -     |           |
|           | 1A           | 2        | 68.75  | -     | ns        |
|           | 2A           | 7        | 58.52  | 21.72 | ns        |
|           | 2B           | 16       | 54.29  | 18.53 | ns        |
|           | 3            | 3        | 32.60  | -     | ns/0.023* |
|           | 4            | 1        | 31.76  | -     | ns        |
| Grade     | 1            | 5        | 61.47  | 41.94 |           |
|           | 2            | 12       | 49.00  | 35.85 | ns        |
|           | 3            | 13       | 55.86  | 19.43 | ns        |
| Survival  | <2 years     | 12       | 54.28  | 28.78 |           |
|           | ≥2 years     | 16       | 50.66  | 29.52 | ns        |

*p*, comparison with respect to the first category of the group being evaluated; \**p*, comparison of TNM 2B to TNM 3; ns, not significant.

**Supplementary Table 2: Clinicopathological data of patients included for Gal-1 detection in plasma samples by ELISA**

|                   | Barcelona-HM |           |             | Liverpool-UL |           |             | Madrid-HUMC |           |             |
|-------------------|--------------|-----------|-------------|--------------|-----------|-------------|-------------|-----------|-------------|
|                   | <i>n</i>     | Sex (M/F) | Age (Range) | <i>n</i>     | Sex (M/F) | Age (Range) | <i>n</i>    | Sex (M/F) | Age (Range) |
| <b>Pathology</b>  |              |           |             |              |           |             |             |           |             |
| <b>Control</b>    | 7            | (4/3)     | (38–75)     | 14           | (9/5)     | (49–66)     | 7           | (4/3)     | (48–55)     |
| <b>CP</b>         | 23           | (17/6)    | (27–84)     | 27           | (18/9)    | (26–76)     | 2           | (0/2)     | (50–56)     |
| <b>PDA</b>        | 31           | (17/14)   | (51–90)     | 28           | (15/13)   | (42–88)     | 31          | (15/16)   | (42–90)     |
| <b>Stage</b>      |              |           |             |              |           |             |             |           |             |
| <b>I</b>          | 2            |           |             | 2            |           |             | 0           |           |             |
| <b>II</b>         | 10           |           |             | 18           |           |             | 3           |           |             |
| <b>III</b>        | 5            |           |             | 0            |           |             | 6           |           |             |
| <b>IV</b>         | 14           |           |             | 8            |           |             | 20          |           |             |
| <b>NA</b>         | 0            |           |             | 0            |           |             | 2           |           |             |
| <b>Grade</b>      |              |           |             |              |           |             |             |           |             |
| <b>Low</b>        | 10           |           |             | 5            |           |             | 2           |           |             |
| <b>High</b>       | 3            |           |             | 18           |           |             | 9           |           |             |
| <b>N/A</b>        | 18           |           |             | 5            |           |             | 20          |           |             |
| <b>Metastasis</b> |              |           |             |              |           |             |             |           |             |
| <b>No</b>         | 17           |           |             | 20           |           |             | 10          |           |             |
| <b>Yes</b>        | 14           |           |             | 8            |           |             | 21          |           |             |

N/A: not ascertained.

**Supplementary Table 3: Analysis of Gal-1 plasma levels according to age in the healthy controls of the three cohorts**

| Cohort       | <i>n</i> | Mean  | SD    | Min | Max | <i>p</i> (Spearman) |
|--------------|----------|-------|-------|-----|-----|---------------------|
| Barcelona-HM | 7        | 56.43 | 11.30 | 38  | 75  | 0.819               |
| Liverpool-UL | 14       | 56.86 | 4.94  | 49  | 66  | 0.265               |
| Madrid-HURC  | 7        | 51.57 | 3.21  | 48  | 55  | 0.857               |

$p > 0.05$  in all cases; Spearman correlation.

**Supplementary Table 4: Comparison of Gal-1 plasma levels between men and women in the healthy controls of the three cohorts**

| Cohort       | Sex    | <i>n</i> | Median | IQR   | <i>p</i> (Mann–Whitney) |
|--------------|--------|----------|--------|-------|-------------------------|
| Barcelona-HM | Male   | 4        | 13.02  | 14.11 | 0.4                     |
|              | Female | 3        | 23.25  | -     |                         |
| Liverpool-UL | Male   | 9        | 17.47  | 7.47  | 0.112                   |
|              | Female | 5        | 13.39  | 9.31  |                         |
| Madrid-HUMC  | Male   | 4        | 16.00  | 7.72  | 0.857                   |
|              | Female | 3        | 16.00  | -     |                         |

*p* > 0.05 in all cases; Mann–Whitney test.

**Supplementary Table 5: Gal-1 plasma levels according to bilirubin levels or diabetes status in PDA patients of the three cohorts**

|           | Barcelona-HM |        |       |          | Liverpool-UL |        |       |          | Madrid-HUMC |        |      |          |
|-----------|--------------|--------|-------|----------|--------------|--------|-------|----------|-------------|--------|------|----------|
|           | <i>n</i>     | Median | IQR   | <i>p</i> | <i>n</i>     | Median | IQR   | <i>p</i> | <i>n</i>    | Median | IQR  | <i>p</i> |
| Bilirubin |              |        |       |          |              |        |       |          |             |        |      |          |
| Normal    | 23           | 34.74  | 15.64 |          | 23           | 23.91  | 12.88 |          | 22          | 20.85  | 9.0  |          |
| High      | 9            | 44.14  | 26.65 | ns       | 28           | 28.832 | 7.44  | ns       | 9           | 23.4   | 18.0 | ns       |
| Diabetes  |              |        |       |          |              |        |       |          |             |        |      |          |
| No        | 21           | 30.29  | 12.31 |          | 49           | 21.42  | 9.58  |          | 23          | 21.6   | 13.0 |          |
| yes       | 15           | 42.68  | 19.56 | ns       | 20           | 24.865 | 10.97 | ns       | 10          | 19.9   | 5.0  | ns       |

ns, not significant.

**Supplementary Table 6: Data for ROC analysis for Gal-1 (three cohorts) and CA19-9 (Barcelona-HM cohort)**

| Cohort       | Groups | AUC        | SE    | <i>p</i> | Cut-off | Sensitivity | Specificity |      |
|--------------|--------|------------|-------|----------|---------|-------------|-------------|------|
| Barcelona-HM | Gal-1  | Ctl vs CP  | 0.932 | 0.045    | 0.001   | 28.16       | 82.6        | 100  |
|              |        | Ctl vs PDA | 0.880 | 0.056    | 0.002   | 28.15       | 77.4        | 100  |
|              |        | CP vs PDA  | 0.568 | 0.078    | 0.396   | -           | -           | -    |
| Barcelona-HM | CA19-9 | Ctl vs CP  | 0.610 | 0.122    | 0.386   | -           | -           | -    |
|              |        | Ctl vs PDA | 0.882 | 0.056    | 0.002   | 70.5        | 82.8        | 100  |
|              |        | CP vs PDA  | 0.865 | 0.057    | <0.0001 | 88.1        | 82.8        | 95.5 |
| Liverpool-UL | Gal-1  | Ctl vs CP  | 0.688 | 0.091    | 0.051   | 16.86       | 88.9        | 50   |
|              |        | Ctl vs PDA | 0.837 | 0.064    | <0.0001 | 22.83       | 75          | 85.7 |
|              |        | CP vs PDA  | 0.669 | 0.075    | 0.031   | 22.39       | 75          | 63   |
| Madrid-HURC  | Gal-1  | Ctl vs PDA | 0.783 | 0.079    | 0.021   | 21.3        | 54.8        | 100  |

AUC, area under curve; CP, chronic pancreatitis group; Ctl, control group; PDA, pancreatic ductal adenocarcinoma group; SE, standard error associated with AUC.

**Supplementary Table 7: CA19-9 levels in Barcelona-HM cohort**

|                | <i>n</i> | Median | IQR    | <i>p</i>     |
|----------------|----------|--------|--------|--------------|
| <b>Control</b> | 7        | 9.00   | 22.40  |              |
| <b>CP</b>      | 22       | 13.30  | 28.05  | 0.409        |
| <b>PDA</b>     | 29       | 405.10 | 689.95 | 0.001/0.000* |

\**p* value of CP compared to PDA. CP, chronic pancreatitis group; PDA, pancreatic ductal adenocarcinoma group.

**Supplementary Table 8: Correlation of Gal-1 plasma levels (standardized in three cohorts) and survival of PDA patients**

| Gal-1 standardized               | <i>n</i> | Median | IQR  | <i>p</i> |
|----------------------------------|----------|--------|------|----------|
| <b>Short term (&lt;6 months)</b> | 16       | 4.67   | 5.47 |          |
| <b>Long term (≥6 months)</b>     | 14       | 1.80   | 2.02 | 0.09     |
